# Supplementary material for: A sulfate radical based ferrous–peroxydisulfate oxidative system for indomethacin degradation in aqueous solutions
Source: Royal Society of Chemistry journal article supplement (doi:10.1039/c7ra03364h), 2017-01-01
Supplement: c7ra03364h1.pdf [file c7ra03364h1.pdf]

*Supporting Material*

**Sulfate radical based ferrous–persulfate oxidative system for  
Indomethacin degradation in aqueous solutions**

Ruobai Li<sup>a</sup>, Jing Kong<sup>a</sup>, Haijin Liu<sup>b</sup>, Ping Chen<sup>a</sup>, Guoguang Liu<sup>a\*</sup>, Fu hua  
Li<sup>c</sup>, Wenying Lv<sup>a</sup>

<sup>a</sup> School of Environmental Science and Engineering, Institute of Environmental Health and  
Pollution Control, Guangdong University of Technology, Guangzhou 510006, China

<sup>b</sup> School of Environment, Henan Normal University, Henan Key laboratory for Environmental  
Pollution Control, Xinxiang 453007, China

<sup>c</sup> School of Environmental and Chemical, Foshan University, Foshan 528000, China

Corresponding author.: Professor Guangguo Liu

Tel.: +86 13533635690; Fax: 86-20-39322548. *E-mail addresses:* [liugg615@163.com](mailto:liugg615@163.com)

The Journal: RSC Advances

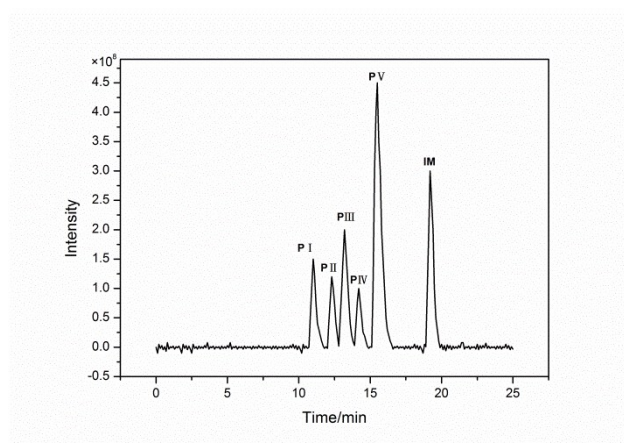

Fig.SM-1. Total ion current (TIC) of LC-MS analysis for Indomethacin degradation in the systems of ferrous activated peroxydisulfate.

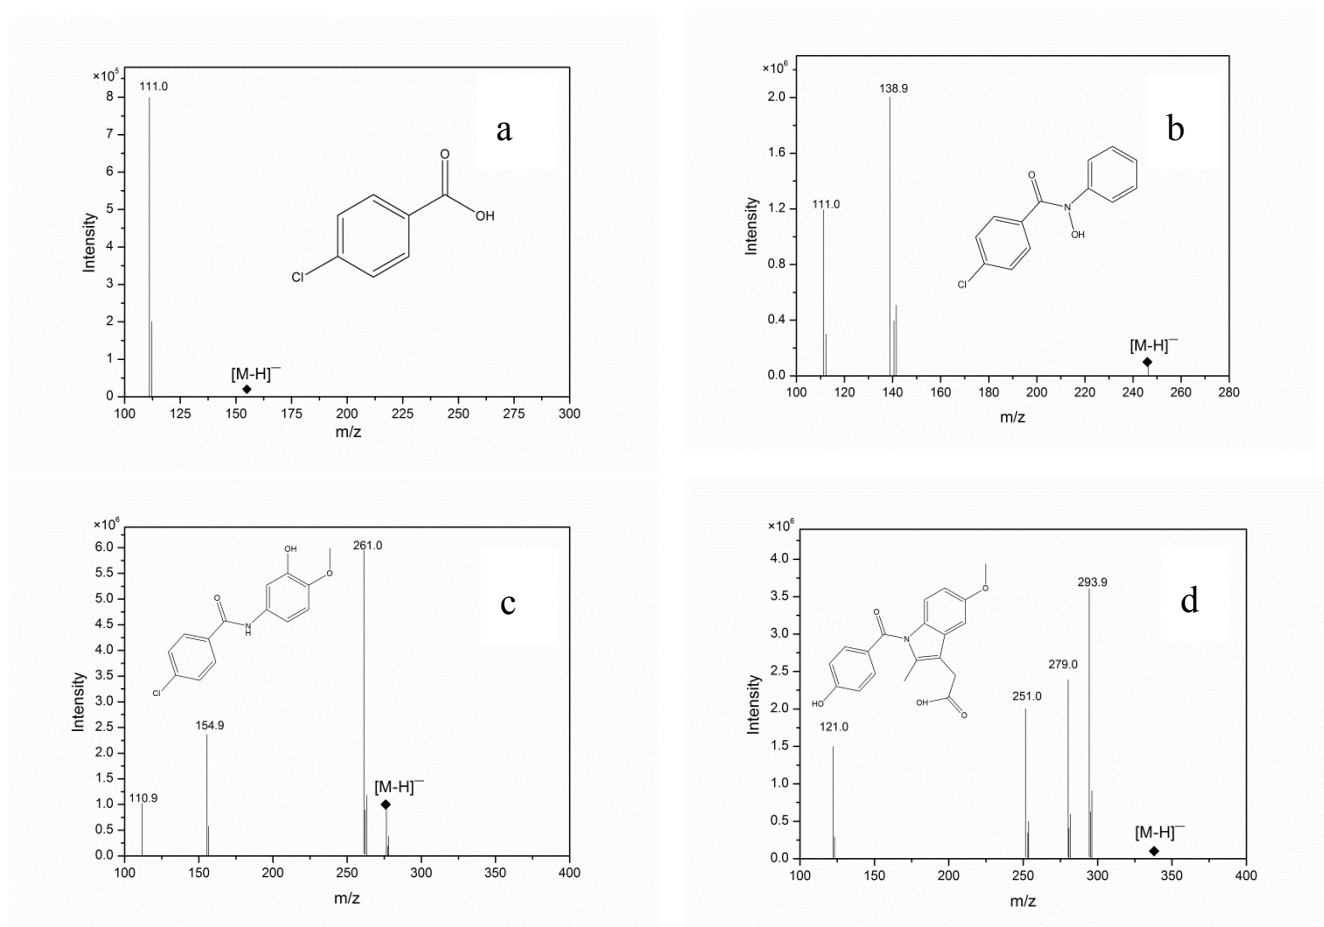

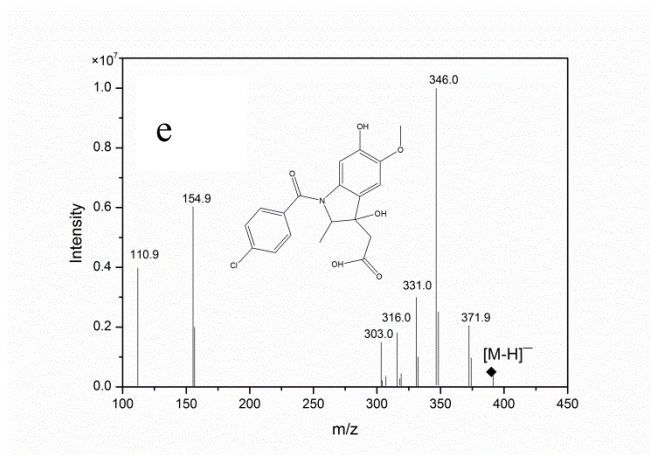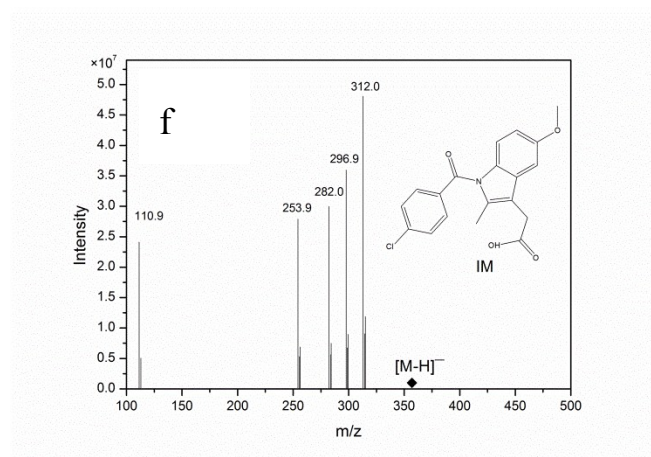

Fig.SM-2 Mass spectra and chemical structures of IM and transformation products
